# Supplementary material for: Gardenia jasminoides Extract, with a Melatonin-Like Activity, Protects against Digital Stress and Reverses Signs of Aging
Source: MDPI journal article supplement (doi:10.3390/ijms24054948), 2023-03-03
Supplement: s1 [file s1]

Supplementary Data

# Gardenia Jasminoides Extract, with a Melatonin-Like Activity, Protects against Digital Stress and Reverses Signs of Aging

Quantification of crocin isomers in *Gardenia jasminoides* J. Ellis fruit extract by HPLC/UV

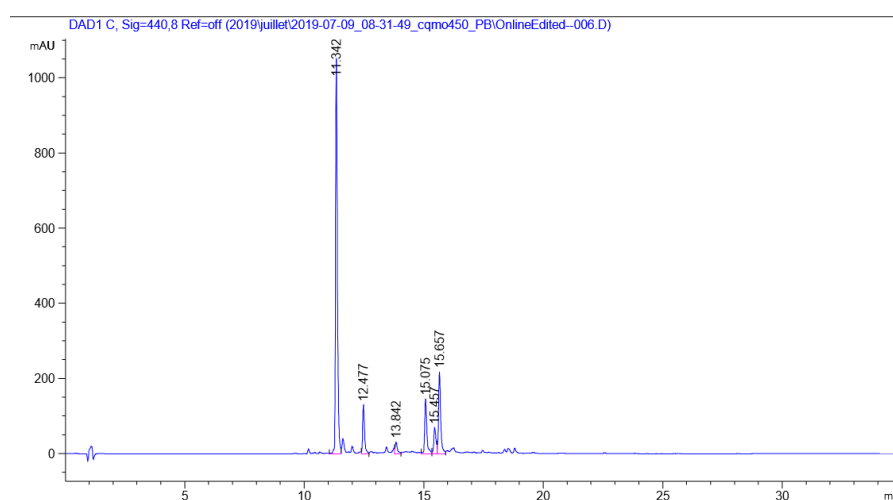

**Figure S1:** Chromatogram at 440nm of *Gardenia jasminoides* J. Ellis fruit extract, ref 1EAA8869, batch n° A187/022/A18

**Table S1.** List of crocin derivatives identified and quantified in *Gardenia jasminoides* fruit extract. ref 1EAA8869. batch n° A187/022/A18. Quantification performed in trans-crocetin di-gentiobioside.

| Time (min) | Crocin Isomers                          |
|------------|-----------------------------------------|
| 11.342     | Trans crocetin di-gentiobioside         |
| 12.477     | Trans crocetin gentiobioside-glucoside  |
| 13.842     | Crocetin gentiobioside                  |
| 15.075     | Cis crocetin di-gentiobioside           |
| 15.457     | Crocetin gentiobioside                  |
| 15.657     | Cis crocetin di-gentiobioside-glucoside |
| 17.000     | Crocetin glucoside                      |
